# Supplementary material
Source: PubMed Central journal article supplement (PMC3432677)
Supplement: NIHMS392236-supplement-02.pdf [file NIHMS392236-supplement-02.pdf]

**Fig. S1.** p53 genomic map, PCR primers and sequencing strategy

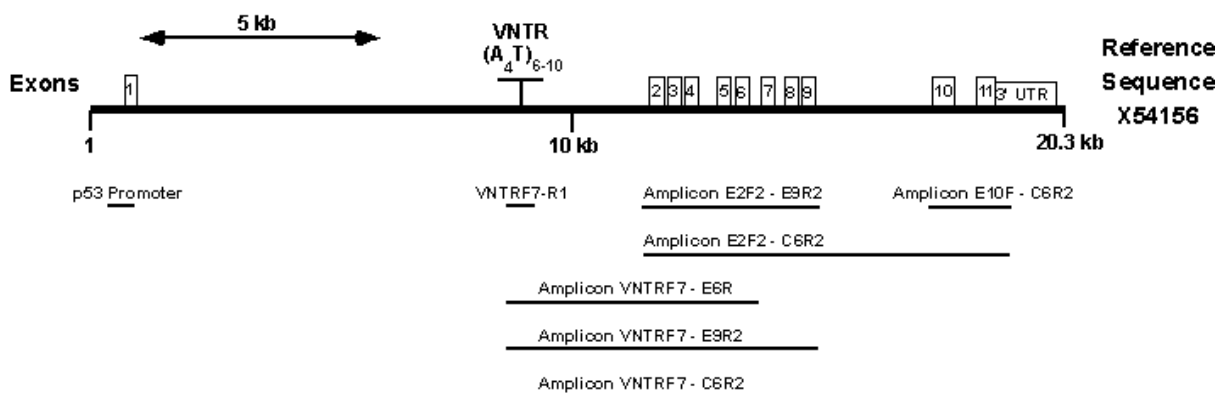

**P53 PCR amplicons:**

| Gene | Primer Pairs           | Reference Sequence | 5' Position of Forward Primer in Reference Sequence X54156 | 5' Position of Reverse Primer in Reference Sequence X54156 | PCR Amplicon Size (bp) |
|------|------------------------|--------------------|------------------------------------------------------------|------------------------------------------------------------|------------------------|
| p53  | p53_E2F2 + p53_E9R2    | HSP53G - X54156    | 11633                                                      | 14847                                                      | 3215                   |
| p53  | p53_E2F2 + p53_C6R2    | HSP53G - X54156    | 11633                                                      | 18785                                                      | 7153                   |
| p53  | p53_VNTRF7+ p53_VNTRR1 | HSP53G - X54156    | 8658                                                       | 9076                                                       | 419                    |
| p53  | p53_VNTRF7 + p53_E6R   | HSP53G - X54156    | 8658                                                       | 13487                                                      | 4830                   |
| p53  | p53_VNTRF7 + p53_E9R2  | HSP53G - X54156    | 8658                                                       | 14847                                                      | 6190                   |
| p53  | p53_VNTRF7 + p53_C6R2  | HSP53G - X54156    | 8658                                                       | 18785                                                      | 10128                  |
| p53  | p53_E10F + p53_C6R2    | HSP53G - X54156    | 17492                                                      | 18785                                                      | 1294                   |

**P53 sequencing primers:**

| Gene | Primer Name | Primer Sequence (5' -> 3')         | Reference Sequence | Orientation of Primer | Primer 5' position in Reference Sequence | Primer 3' position in Reference Sequence | Primer Length (nt) |
|------|-------------|------------------------------------|--------------------|-----------------------|------------------------------------------|------------------------------------------|--------------------|
| p53  | p53_VNTRF7  | CTTTCCTCAACTCTACATTTCCATAATACATAGA | HSP53G - X54156    | F                     | 8658                                     | 8692                                     | 35                 |
| p53  | p53_VNTRR1  | ACAAAACATCCCCCTACCAACAGC           | HSP53G - X54156    | R                     | 9076                                     | 9053                                     | 24                 |
| p53  | p53_C6R2    | GCACACCTATTGCAAGCAAGGG             | HSP53G - X54156    | R                     | 18785                                    | 18764                                    | 22                 |
| p53  | p53_E10F    | TCAAACAATTGTAACCTGAACCATC          | HSP53G - X54156    | F                     | 17492                                    | 17516                                    | 25                 |
| p53  | p53_E10R3   | TCCTATGGCTTTCCAACCTAG              | HSP53G - X54156    | R                     | 17742                                    | 17722                                    | 21                 |
| p53  | p53_E10RS2  | GGGCTCAAACCTCCGACC                 | HSP53G - X54156    | R                     | 18171                                    | 18154                                    | 18                 |
| p53  | p53_E11FS2  | GCGCAGTGGCTCACGAA                  | HSP53G - X54156    | F                     | 18098                                    | 18114                                    | 17                 |
| p53  | p53_E2F2    | CAGGTGACCCAGGGTTGGAAG              | HSP53G - X54156    | F                     | 11633                                    | 11653                                    | 21                 |
| p53  | p53_E3R     | CCCAACCTTGCTCTACCAGAAC             | HSP53G - X54156    | R                     | 11945                                    | 11922                                    | 24                 |
| p53  | p53_E4R2n   | AAACACTGACAGGAAGCCAAAGG            | HSP53G - X54156    | R                     | 12418                                    | 12396                                    | 23                 |
| p53  | p53_E5F     | ACTTGTGCCCTGACTTTCAAC              | HSP53G - X54156    | F                     | 13010                                    | 13030                                    | 21                 |
| p53  | p53_E6R     | CCAAGTACAACCCCTTAAC                | HSP53G - X54156    | R                     | 13487                                    | 13467                                    | 21                 |
| p53  | p53_E7F     | AGGTCTCCCAAGGCG                    | HSP53G - X54156    | F                     | 13949                                    | 13964                                    | 16                 |
| p53  | p53_E7R3    | GATGGGTAGTAGTATGGAAGAAATCGG        | HSP53G - X54156    | R                     | 14218                                    | 14192                                    | 27                 |
| p53  | p53_E8F2    | GATTTCTTACTGCCTCTTGCTTCTC          | HSP53G - X54156    | F                     | 14408                                    | 14433                                    | 26                 |
| p53  | p53_E9R2    | CCCAATTGCAGGTAAACAGTC              | HSP53G - X54156    | R                     | 14847                                    | 14826                                    | 22                 |
| p53  | P53_i4F2    | AAAGAAAAGCTCCTGAGGTGATAGCG         | HSP53G - X54156    | F                     | 12895                                    | 12920                                    | 26                 |
| p53  | P53_i4R     | CTTTTTTTTTTTTTTTGAGATAGGGTC        | HSP53G - X54156    | R                     | 12898                                    | 12872                                    | 27                 |
| p53  | p53_i6F2    | AAATTAGCCGGCGTGGTGCT               | HSP53G - X54156    | F                     | 13762                                    | 13782                                    | 21                 |
| p53  | p53_i6R     | CCTTTTTTTTTTTTTTTGAGATGGAA         | HSP53G - X54156    | R                     | 13931                                    | 13905                                    | 27                 |
| p53  | p53_in3F    | GGGCTGGGGGCTGA                     | HSP53G - X54156    | F                     | 11967                                    | 11981                                    | 15                 |
